# Supplementary material for: Computational Analysis of the Related Factors of Deep Vein Thrombosis (DVT) Formation in Patients Undergoing Hip Fracture Surgery
Source: Hindawi journal article supplement (doi:10.1155/2022/1127095), 2022-05-27
Supplement: f1 [file 1127095.f1.pdf]

| gender | age | diagnose                   | Type of surgery         | Caprin i score | Thrombu s site | Quantit ative fibrinogen g/L | Platele t count 10 <sup>9</sup> /L | D-dimer quantit ative mg/L |
|--------|-----|----------------------------|-------------------------|----------------|----------------|------------------------------|------------------------------------|----------------------------|
| female | 91  | Femoral neck fracture      | f:Femoral head          | 10             | none           | 5.59                         | 164                                | 102.19                     |
| female | 89  | Femoral neck fracture      | f:Femoral head          | 12             | none           | 6.02                         | 152                                | 2.55                       |
| female | 88  | Femoral neck fracture      | f:Femoral head          | 14             | vascular space | 6.65                         | 174                                | 3.3                        |
| female | 88  | Femoral neck fracture      | f:Femoral head          | 15             | vascular space | 1.95                         | 102                                | 5.98                       |
| female | 87  | Femoral neck fracture      | f:Femoral head          | 9              | vascular space | 3.88                         | 103                                | 1.17                       |
| female | 87  | Femoral neck fracture      | f:internal fixation     | 12             | vascular space | 2.96                         | 248                                | 2.8                        |
| female | 86  | Femoral neck fracture      | f:Femoral head          | 11             | none           | 6.76                         | 288                                | 1.68                       |
| male   | 86  | Femoral neck fracture      | f:Femoral head          | 14             | vascular space | 4.11                         | 125                                | 3.13                       |
| male   | 86  | Femoral neck fracture      | f:Femoral head          | 9              | none           | 3.65                         | 291                                | 0.5                        |
| female | 85  | Femoral neck fracture      | f:Femoral head          | 16             | none           | 4.79                         | 317                                | 1.83                       |
| female | 85  | Femoral neck fracture      | f:Femoral head          | 7              | vascular space | 4.33                         | 230                                | 4.61                       |
| male   | 85  | Femoral neck fracture      | f:none                  | 11             | none           | 5.59                         | 97                                 | 6.92                       |
| female | 85  | Intertrochanteric fracture | f:internal fixation     | 11             | vascular space | 5.22                         | 156                                | 4.02                       |
| female | 84  | Femoral neck fracture      | f:Femoral head          | 11             | vascular space | 3.44                         | 127                                | 7.44                       |
| male   | 83  | Femoral neck fracture      | f:Femoral head          | 17             | vascular space | 6.66                         | 283                                | 3.05                       |
| male   | 83  | Femoral neck fracture      | f:none                  | 10             | none           | 4.08                         | 323                                | 2.95                       |
| female | 82  | Femoral neck fracture      | f:Total hip replacement | 11             | vascular space | 3.09                         | 295                                | 2.32                       |
| female | 81  | Femoral neck fracture      | f:Femoral head          | 11             | none           | 6.84                         | 218                                | 7.55                       |
| female | 80  | Femoral neck fracture      | f:Femoral head          | 13             | vascular space | 3.84                         | 190                                | 3.4                        |
| female | 79  | Femoral shaft fracture     | f:none                  | 11             | none           | 7.51                         | 298                                | 2.53                       |
| male   | 77  | Femoral neck fracture      | f:Total hip replacement | 10             | none           | 4.56                         | 139                                | 3.55                       |
| female | 76  | Femoral neck fracture      | f:Total hip replacement | 12             | none           | 4.95                         | 258                                | 3.33                       |
| male   | 75  | 左Femoral neck fracture     | f:internal fixation     | 8              | vascular space | 4.78                         | 165                                | 2.02                       |
| female | 74  | Femoral neck fracture      | f:Femoral head          | 14             | vascular space | 2.71                         | 79                                 | 14.11                      |
| female | 73  | Left iliac bone fracture   | f:none                  | 8              | vascular space | 4.65                         | 103                                | 9.33                       |
| female | 73  | Femoral neck fracture      | f:none                  | 8              | none           | 3.06                         | 114                                | 120.56                     |
| male   | 72  | Femoral neck fracture      | f:Femoral head          | 8              | none           | 5.80                         | 254                                | 13.88                      |
| female | 72  | Femoral neck fracture      | f:Femoral head          | 14             | vascular space | 4.48                         | 209                                | 10.25                      |
| male   | 72  | Femoral neck fracture      | f:Total hip replacement | 8              | vascular space | 3.33                         | 197                                | 16.84                      |
| female | 71  | Femoral neck fracture      | f:Total hip replacement | 10             | vascular space | 5.8                          | 241                                | 1.16                       |
| female | 70  | Femoral neck fracture      | f:Femoral head          | 10             | none           | 4.22                         | 357                                | 2.46                       |
| female | 69  | Femoral neck fracture      | f:none                  | 9              | none           | 6.06                         | 140                                | 2.11                       |
| female | 69  | Femoral neck fracture      | f:Total hip replacement | 9              | none           | 4.06                         | 189                                | 33.25                      |
| female | 68  | Femoral neck fracture      | f:Total hip replacement | 9              | none           | 2.86                         | 134                                | 21.83                      |
| female | 68  | Femoral neck fracture      | f:none                  | 8              | none           | 4.33                         | 168                                | 2.78                       |
| female | 67  | Femoral neck fracture      | f:internal fixation     | 11             | none           | 4.23                         | 178                                | 11.57                      |
| female | 66  | Femoral neck fracture      | f:Total hip replacement | 11             | none           | 4.22                         | 269                                | 3.97                       |

|        |    |                        |                       |    |                |       |     |        |
|--------|----|------------------------|-----------------------|----|----------------|-------|-----|--------|
| female | 65 | Femoral neck fracture  | internal fixation     | 13 | osteosynthetic | 5.47  | 142 | 5.42   |
| female | 65 | Femoral neck fracture  | Total hip replacement | 11 | none           | 7.83  | 348 | 2.14   |
| male   | 65 | Femoral neck fracture  | Total hip replacement | 11 | none           | 3.95  | 184 | 1.97   |
| female | 64 | Femoral neck fracture  | internal fixation     | 11 | none           | 4.11  | 106 | 1.64   |
| male   | 63 | Femoral neck fracture  | Femoral head          | 10 | none           | 5.22  | 118 | 7.88   |
| male   | 62 | Femoral neck fracture  | internal fixation     | 10 | none           | 3.61  | 259 | 4.58   |
| female | 61 | Femoral neck fracture  | Total hip replacement | 10 | none           | 2.53  | 212 | 0.27   |
| female | 61 | Femoral neck fracture  | none                  | 9  | none           | 4.22  | 362 | 0.97   |
| female | 60 | Femoral neck fracture  | internal fixation     | 11 | none           | 4.37  | 248 | 19.41  |
| female | 59 | Femoral neck fracture  | none                  | 10 | none           | 7.83  | 185 | 2.19   |
| male   | 58 | Femoral neck fracture  | internal fixation     | 9  | none           | 4.30  | 128 | 0.84   |
| male   | 58 | Femoral neck fracture  | internal fixation     | 8  | none           | 3.64  | 210 | 16.71  |
| male   | 57 | Acetabular fracture    | internal fixation     | 7  | none           | 2.34  | 199 | 27.19  |
| female | 56 | Femoral neck fracture  | internal fixation     | 12 | osteosynthetic | 5.07  | 152 | 2.07   |
| male   | 56 | Femoral neck fracture  | Femoral head          | 8  | none           | 1.8   | 36  | 80.57  |
| female | 55 | Femoral neck fracture  | internal fixation     | 10 | none           | 2.12  | 135 | 115.94 |
| female | 48 | Femoral neck fracture  | internal fixation     | 11 | osteosynthetic | 2.24  | 234 | 13.6   |
| female | 45 | Femoral neck fracture  | internal fixation     | 10 | none           | 3.18  | 228 | 85.3   |
| male   | 38 | Intertrochanteric      | internal fixation     | 8  | none           | 2.80  | 208 | 4.63   |
| male   | 37 | Femoral neck fracture  | internal fixation     | 5  | none           | 60.07 | 136 | 189.6  |
| male   | 31 | Femoral shaft fracture | internal fixation     | 9  | none           | 2.57  | 217 | 5.90   |
| female | 23 | Femoral neck fracture  | internal fixation     | 8  | none           | 2.57  | 212 | 12.87  |
| male   | 23 | Femoral shaft fracture | internal fixation     | 9  | none           | 2.12  | 215 | 0.81   |

| heparin              | rivaroxaban | Intermediate frequency electrical stimulation | Intermittent pneumatic compression therapy | smoke | hypertension | coronary heart disease | chronic obstructive pulmonary disease | Cardiac insufficiency | hypertension | Cerebrovascular disease |
|----------------------|-------------|-----------------------------------------------|--------------------------------------------|-------|--------------|------------------------|---------------------------------------|-----------------------|--------------|-------------------------|
| 4100QdNaxaparin      | yes         | none                                          | 2 position                                 | none  | none         | yes                    | none                                  | none                  | none         | none                    |
| 4100QdNaxaparin      | yes         | none                                          | 2 position                                 | none  | yes          | none                   | yes                                   | none                  | none         | none                    |
| 4100QdNaxaparin      | yes         | none                                          | 2 position                                 | none  | none         | none                   | none                                  | none                  | none         | yes                     |
| 4100QdNaxaparin      | yes         | none                                          | none                                       | none  | none         | none                   | none                                  | yes                   | none         | yes                     |
| 4100QdNaxaparin      | none        | none                                          | 2 position                                 | none  | yes          | none                   | none                                  | none                  | none         | none                    |
| 4100QdNaxaparin      | none        | none                                          | 2 position                                 | none  | yes          | none                   | none                                  | none                  | none         | yes                     |
| 4100QdNaxaparin      | yes         | none                                          | 2 position                                 | yes   | yes          | none                   | none                                  | none                  | none         | none                    |
| 4100QdNaxaparin      | none        | none                                          | 2 position                                 | none  | none         | none                   | yes                                   | none                  | none         | none                    |
| 4100QdNaxaparin      |             | Bid                                           | 2 position                                 | none  | yes          | none                   | none                                  | none                  | none         | none                    |
| 4000qdEnoxaparin     | yes         | none                                          | 2 position                                 | none  | yes          | none                   | none                                  | none                  | none         | none                    |
| 4100QdNaxaparin      | yes         | none                                          | 2 position                                 | none  | none         | none                   | none                                  | none                  | none         | yes                     |
| 4100QdNaxaparin      | none        | none                                          | none                                       | none  | yes          | yes                    | none                                  | yes                   | none         | yes                     |
| 4100QdNaxaparin      | yes         | none                                          | 2 position                                 | none  | yes          | yes                    | none                                  | none                  | none         | none                    |
| 4100QdNaxaparin      | yes         | none                                          | 1 position                                 | none  | yes          | none                   | none                                  | none                  | none         | none                    |
| 4000qdEnoxaparin     | yes         | none                                          | 2 position                                 | none  | yes          | yes                    | none                                  | none                  | none         | none                    |
| 4100QdNaxaparin      | none        | none                                          | none                                       | none  | yes          | none                   | none                                  | none                  | none         | yes                     |
| 4100QdNaxaparin      | none        | none                                          | 1 position                                 | none  | yes          | yes                    | none                                  | none                  | none         | none                    |
| 4100QdNaxaparin      | yes         | yes                                           | 2 position                                 | none  | none         | none                   | yes                                   | none                  | none         | yes                     |
| 4000qdEnoxaparin     | none        | none                                          | 1 position                                 | none  | none         | none                   | none                                  | none                  | none         | none                    |
| 4100QdNaxaparin      | none        | none                                          | 2 position                                 | none  | yes          | yes                    | none                                  | none                  | none         | none                    |
| 4100QdNaxaparin      | none        | none                                          | 2 position                                 | none  | yes          | none                   | none                                  | none                  | none         | none                    |
| 4100QdNaxaparin      | yes         | none                                          | 2 position                                 | none  | yes          | none                   | none                                  | none                  | none         | none                    |
| 4100QdNaxaparin      | yes         | none                                          | 2 position                                 | none  | yes          | none                   | none                                  | none                  | none         | none                    |
| 4100QdNaxaparin      | yes         | yes                                           | 2 position                                 | none  | none         | none                   | none                                  | none                  | none         | none                    |
| 4100QdNaxaparin      | yes         | none                                          | none                                       | none  | none         | none                   | none                                  | none                  | none         | none                    |
| 4100QdNaxaparin      | yes         | none                                          | 2 position                                 | none  | yes          | yes                    | none                                  | none                  | none         | none                    |
| 4100QdNaxaparin      | yes         | none                                          | 2 position                                 | none  | yes          | yes                    | none                                  | none                  | none         | none                    |
| 4100QdNaxaparin      | yes         | none                                          | 2 position                                 | none  | none         | none                   | none                                  | none                  | none         | none                    |
| 4100QdNaxaparin      | yes         | yes                                           | 2 position                                 | none  | none         | none                   | none                                  | none                  | none         | none                    |
| 4100QdNaxaparin      | yes         | none                                          | 2 position                                 | none  | none         | none                   | none                                  | none                  | none         | none                    |
| 4100QdNaxaparin      |             | none                                          | none                                       | none  | none         | none                   | none                                  | none                  | none         | none                    |
| 4100QdNaxaparin      | yes         | yes                                           | 2 position                                 | none  | yes          | none                   | none                                  | none                  | none         | none                    |
| 4100QdNaxaparin      | yes         | none                                          | 2 position                                 | none  | yes          | none                   | none                                  | none                  | none         | none                    |
| Low molecular weight | none        | yes                                           | 2 position                                 | none  | yes          | none                   | none                                  | none                  | none         | none                    |
| 4100QdNaxaparin      | yes         | none                                          | 2 position                                 | none  | yes          | none                   | none                                  | none                  | none         | none                    |
| 4100QdNaxaparin      | none        | none                                          | 2 position                                 | none  | yes          | yes                    | none                                  | none                  | none         | none                    |
| 4100QdNaxaparin      | yes         | yes                                           | 2 position                                 | none  | yes          | none                   | none                                  | none                  | none         | none                    |
| 4100QdNaxaparin      | yes         | none                                          | 2 position                                 | none  | none         | none                   | none                                  | none                  | none         | none                    |
| 4100QdNaxaparin      |             | none                                          | none                                       | none  | none         | none                   | none                                  | none                  | none         | none                    |
| 4100QdNaxaparin      | yes         | yes                                           | 2 position                                 | none  | yes          | none                   | none                                  | none                  | none         | none                    |
| 4100QdNaxaparin      | yes         | none                                          | 2 position                                 | none  | yes          | none                   | none                                  | none                  | none         | none                    |



| History of DVT | Thrombolytic | Chemotherapy | Operation Duration (minutes) | Inpatient Duration (Days) | Total cost (CNY) |
|----------------|--------------|--------------|------------------------------|---------------------------|------------------|
| none           | none         | none         | 130                          | 12                        | 67496            |
| none           | none         | none         | 140                          | 16                        | 41138            |
| none           | none         | none         |                              | 12                        | 61112            |
| yes            | none         | none         |                              | 18                        | 72584            |
| none           | none         | none         |                              | 16                        | 77918            |
| none           | none         | none         | 125                          | 6                         | 51082            |
| none           | none         | none         | 75                           | 21                        | 87800            |
| yes            | none         | none         | 107                          | 10                        | 68000            |
| none           | none         | none         |                              | 10                        | 75007            |
| none           | none         | none         |                              | 10                        | 55000            |
| none           | none         | none         | 95                           | 9                         | 54089            |
| none           | none         | none         |                              | 4                         | 7138             |
| none           | none         | none         | 165                          | 19                        | 77860            |
| none           | none         | none         |                              | 24                        | 76115            |
| none           | none         | none         | 70                           | 7                         | 51833            |
| none           | none         | none         |                              | 6                         | 11467            |
| none           | none         | none         | 120                          | 15                        | 74792            |
| none           | none         | none         |                              | 48                        | 78000            |
| none           | none         | none         | 120                          | 20                        | 79500            |
| none           | none         | none         |                              | 4                         | 8405             |
| none           | none         | none         | 120                          | 20                        | 82646            |
| none           | none         | none         |                              | 18                        | 74000            |
| none           | none         | none         | 55                           | 11                        |                  |
| none           | none         | none         |                              | 9                         | 57123            |
| none           | none         | none         |                              | 6                         | 20947            |
| none           | none         | none         |                              | 8                         | 8426             |
| none           | yes          | none         |                              | 7                         | 63500            |
| none           | none         | none         |                              | 18                        | 56730            |
| none           | none         | none         |                              | 5                         | 96054            |
| none           | none         | none         |                              | 30                        | 160005           |
| none           | none         | none         | 130                          | 18                        | 74030            |
| none           | none         | none         |                              | 10                        | 20717            |
| none           | none         | none         |                              | 8                         | 73489            |
| none           | none         | none         | 100                          | 13                        | 95000            |
| none           | none         | none         |                              | 10                        | 12460            |
| none           | none         | none         |                              | 10                        | 56700            |
| none           | none         | none         |                              | 15                        | 63167            |

|      |      |      |     |    |        |
|------|------|------|-----|----|--------|
| none | none | none | 180 | 27 | 72721  |
| none | none | none | 125 | 20 | 75500  |
| none | none | none |     | 13 | 82854  |
| none | none | none | 80  | 4  | 30000  |
| none | yes  | none | 115 | 19 | 92000  |
| none | none | none | 100 | 4  | 24960  |
| none | none | none |     | 17 | 97500  |
| none | none | none |     | 3  | 5866   |
| none | none | none | 115 | 4  | 26230  |
| none | none | yes  |     | 8  | 16562  |
| none | none | none | 95  | 8  | 32788  |
| none | none | none |     | 11 | 44200  |
| none | none | none | 118 | 5  | 71814  |
| none | none | none |     | 6  | 30900  |
| none | none | none |     | 20 | 97126  |
| none | none | none | 105 | 5  | 33100  |
| none | none | none | 330 | 24 | 160000 |
| none | none | none | 70  | 7  | 31200  |
| none | none | none | 146 | 6  | 48564  |
| none | none | none |     | 8  | 40218  |
| none | none | none | 165 | 6  | 32200  |
| none | none | none | 130 | 2  | 26172  |
| none | none | none | 220 | 25 | 54900  |
